# Supplementary material for: Evaluation of calcium-, carbon- and sulfur-based non-spectral interferences in high-power MIP-OES: comparison with ICP-OES
Source: Royal Society of Chemistry journal article supplement (doi:10.1039/c9ja00148d), 2019-01-01
Supplement: c9ja00148d1.pdf [file c9ja00148d1.pdf]

1

2 Supplementary information

3

4

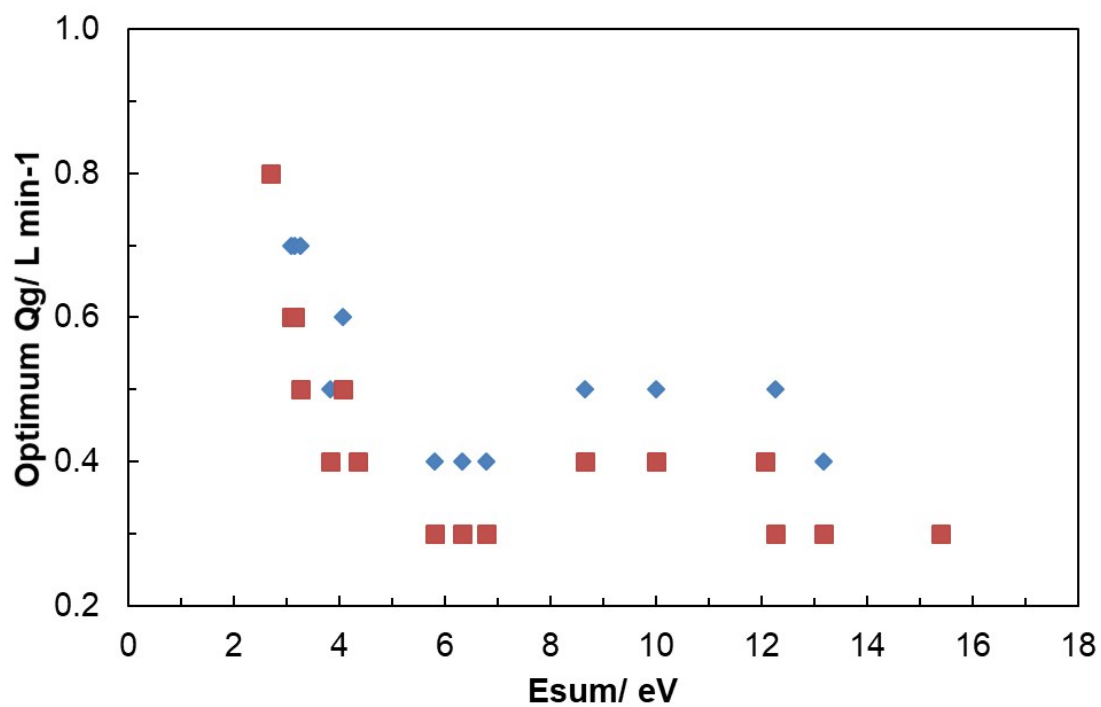

5

6 Figure S1. Optimum the nebulizer gas flow rate ( $Q_g$ ) for emission lines of different  
7  $E_{sum}$  operating ( $\blacklozenge$ ) 1.0% w w<sup>-1</sup> nitric acid and, ( $\blacksquare$ ) 0.5% w w<sup>-1</sup> calcium nitrate  
8 solutions in MIP-OES.

9

10

11

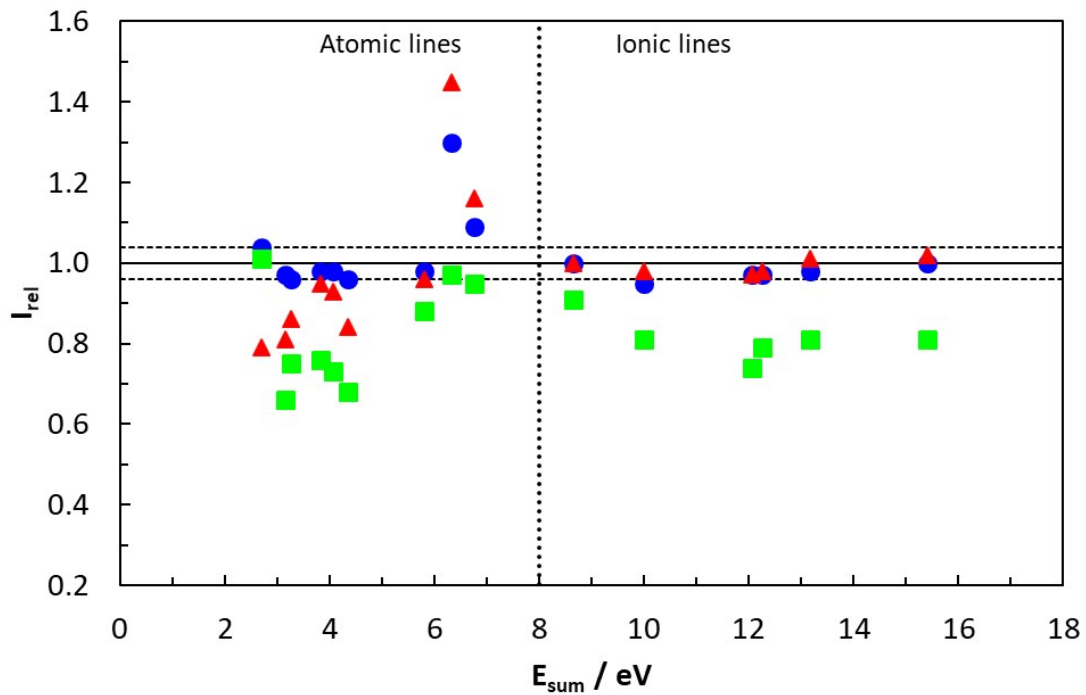

12

13

14 Figure S2. Influence of  $E_{sum}$  on the relative signal intensity ( $I_{rel}$ ) obtained in ICP-

15 OES operating 1400 W rf power for different emission lines operating (■) 0.5% w

16  $w^{-1}$  calcium nitrate; (▲) 5%  $w w^{-1}$  glycerol; and (●) 5%  $w w^{-1}$  sulfuric acid

17 solutions, in comparison to the corresponding 1.0%  $w w^{-1}$  nitric acid.  $Q_g$  0.6 L  $min^{-1}$ .

18 <sup>1</sup>.  $I_{rel}$  values in-between dashed lines indicate no matrix effects.

19

20

21

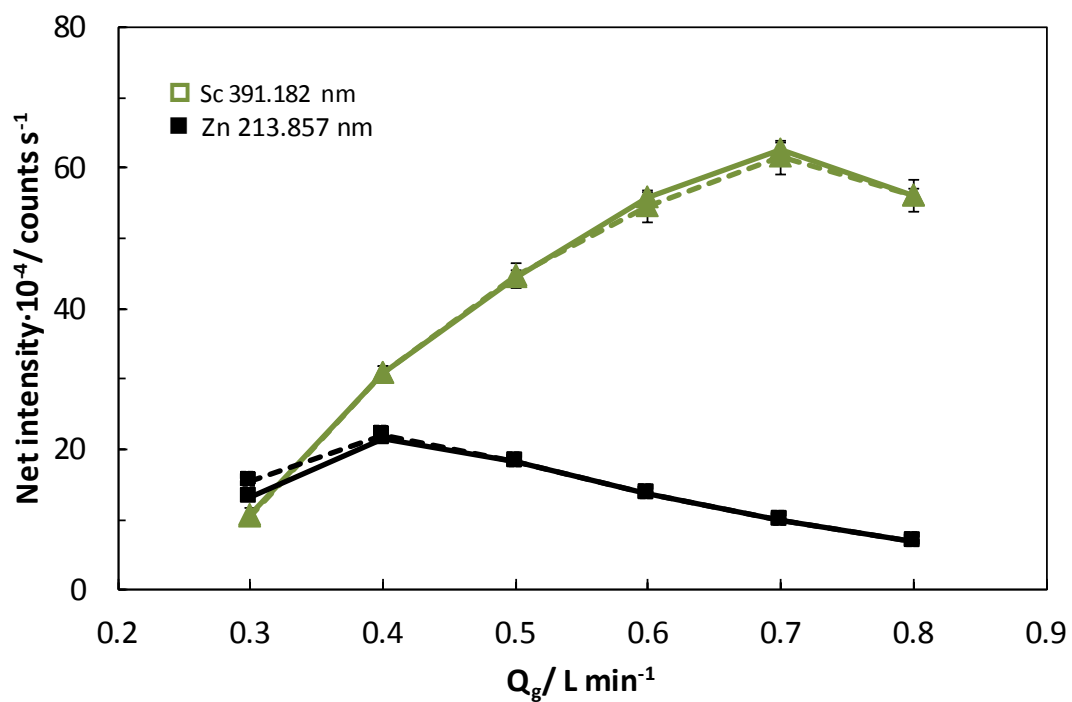

22

23 Figure S3. Influence of the nebulizer gas flow rate ( $Q_g$ ) on the net emission signal  
24 obtained in MIP-OES for (□) Sc I 391.182 nm; and, (■) Zn 213.857 nm when  
25 operating a 5% w w<sup>-1</sup> glycerol (dashed lines) and 1.0% w w<sup>-1</sup> nitric acid  
26 (continuous lines) solutions.

27

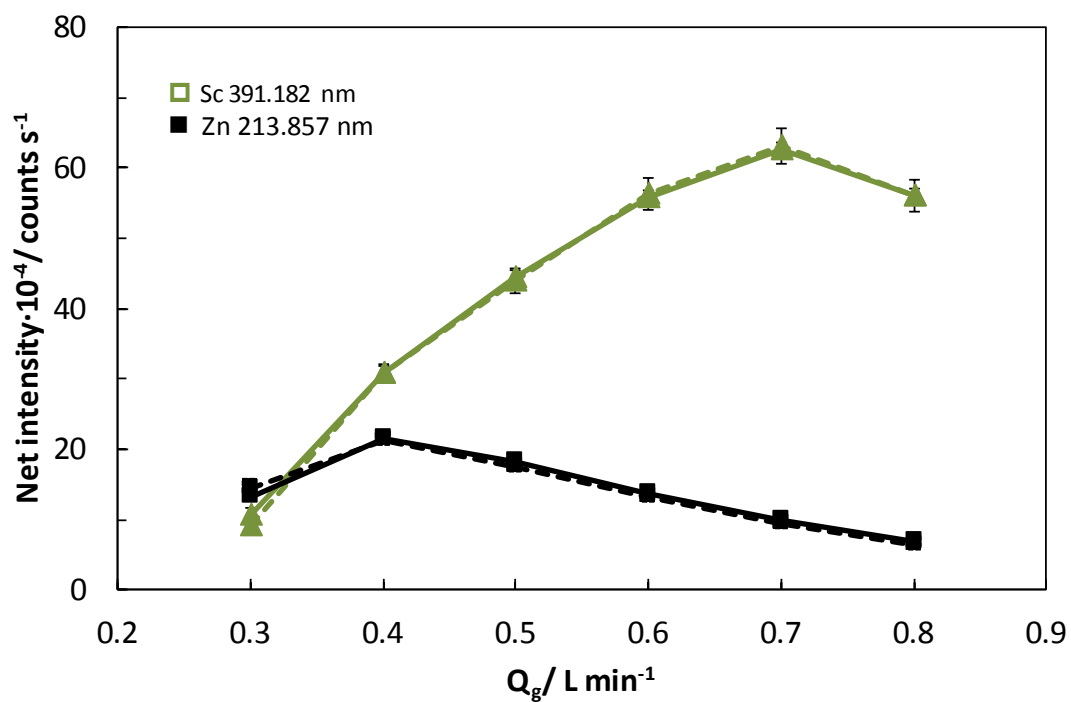

29

30 Figure S4. Influence of the nebulizer gas flow rate ( $Q_g$ ) on the net emission signal

31 obtained in MIP-OES for (□) Sc I 391.182 nm; and, (■) Zn 213.857 nm when

32 operating a 5% w w<sup>-1</sup> sulfuric acid (dashed lines) and 1.0% w w<sup>-1</sup> nitric acid

33 (continuous lines) solutions.

34
